# Supplementary material for: Evaluation of omadacycline against intracellular Mycobacterium abscessus in an infection model in human macrophages
Source: PubMed Central journal article supplement (PMC10502775; doi:10.1093/jacamr/dlad104), 2023-09-15
Supplement: dlad104_supplementary_data.pdf [file dlad104_supplementary_data.pdf]

| Organism                         | MIC mg/L      |                               |          |                  |
|----------------------------------|---------------|-------------------------------|----------|------------------|
|                                  | Omadacycline  | Tigecycline                   | Amikacin | Clarithromycin   |
| <i>M. perigrinum</i> ATCC 700686 | 0.25          | 0.06 (0.03-0.25) <sup>1</sup> | 1 (≤1-4) | 0.25 (≤0.06-0.5) |
| <i>M. abscessus</i> ATCC 19977   | 0.12          | 0.12                          | 8        | 2                |
| <i>M. abscessus</i> MMX 9450     | 0.5           | 0.25                          | 8        | 2                |
| <i>S. aureus</i> ATCC 29213      | 0.25 (0.12-1) | 0.12 (0.03-0.25)              | 4 (1-4)  | 0.5 (0.12-0.5)   |

<sup>1</sup>CLSI acceptable QC value range shown in parentheses where available

**Supplemental Table 1. MIC values of test agent and comparators against *M. abscessus* and QC isolates.** MIC values were determined by broth microdilution following recommendations from CLSI. MIC values were used for determination of test concentrations during the intracellular time-kill assay.
